# Supplementary material
Source: publisher figshare collection journal article supplement (https://karger.figshare.com/ndownloader/files/20079941)

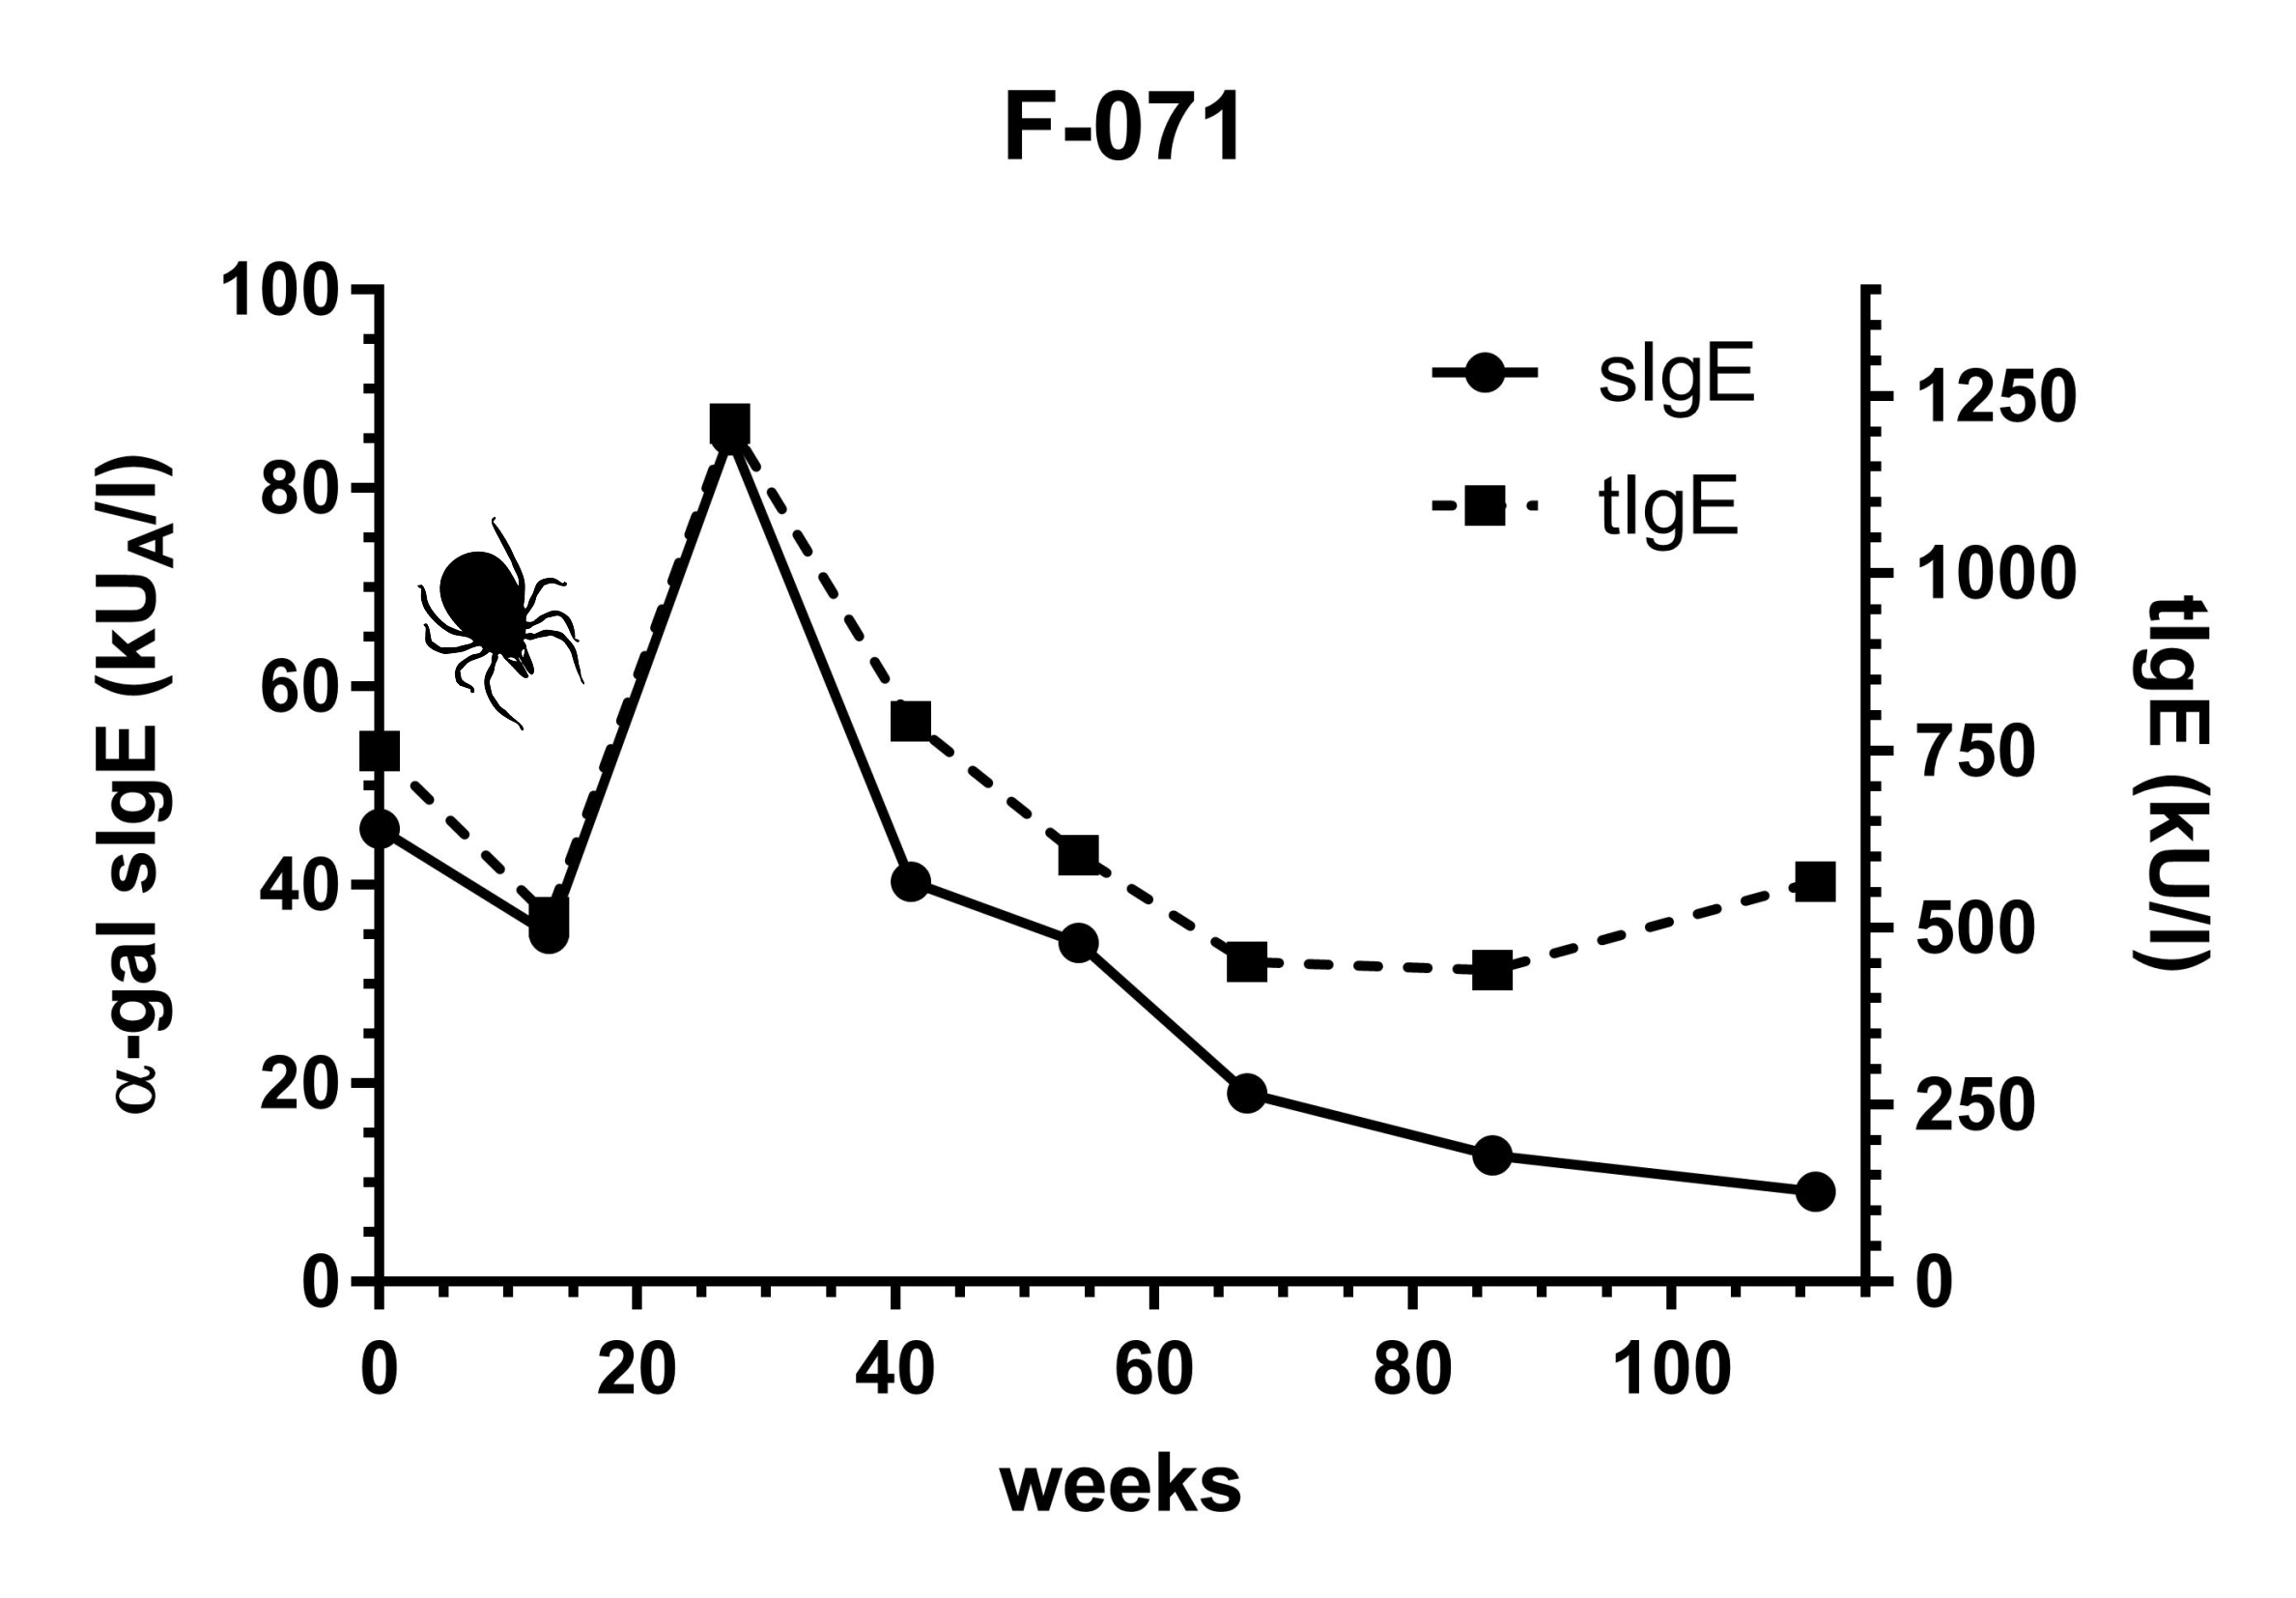


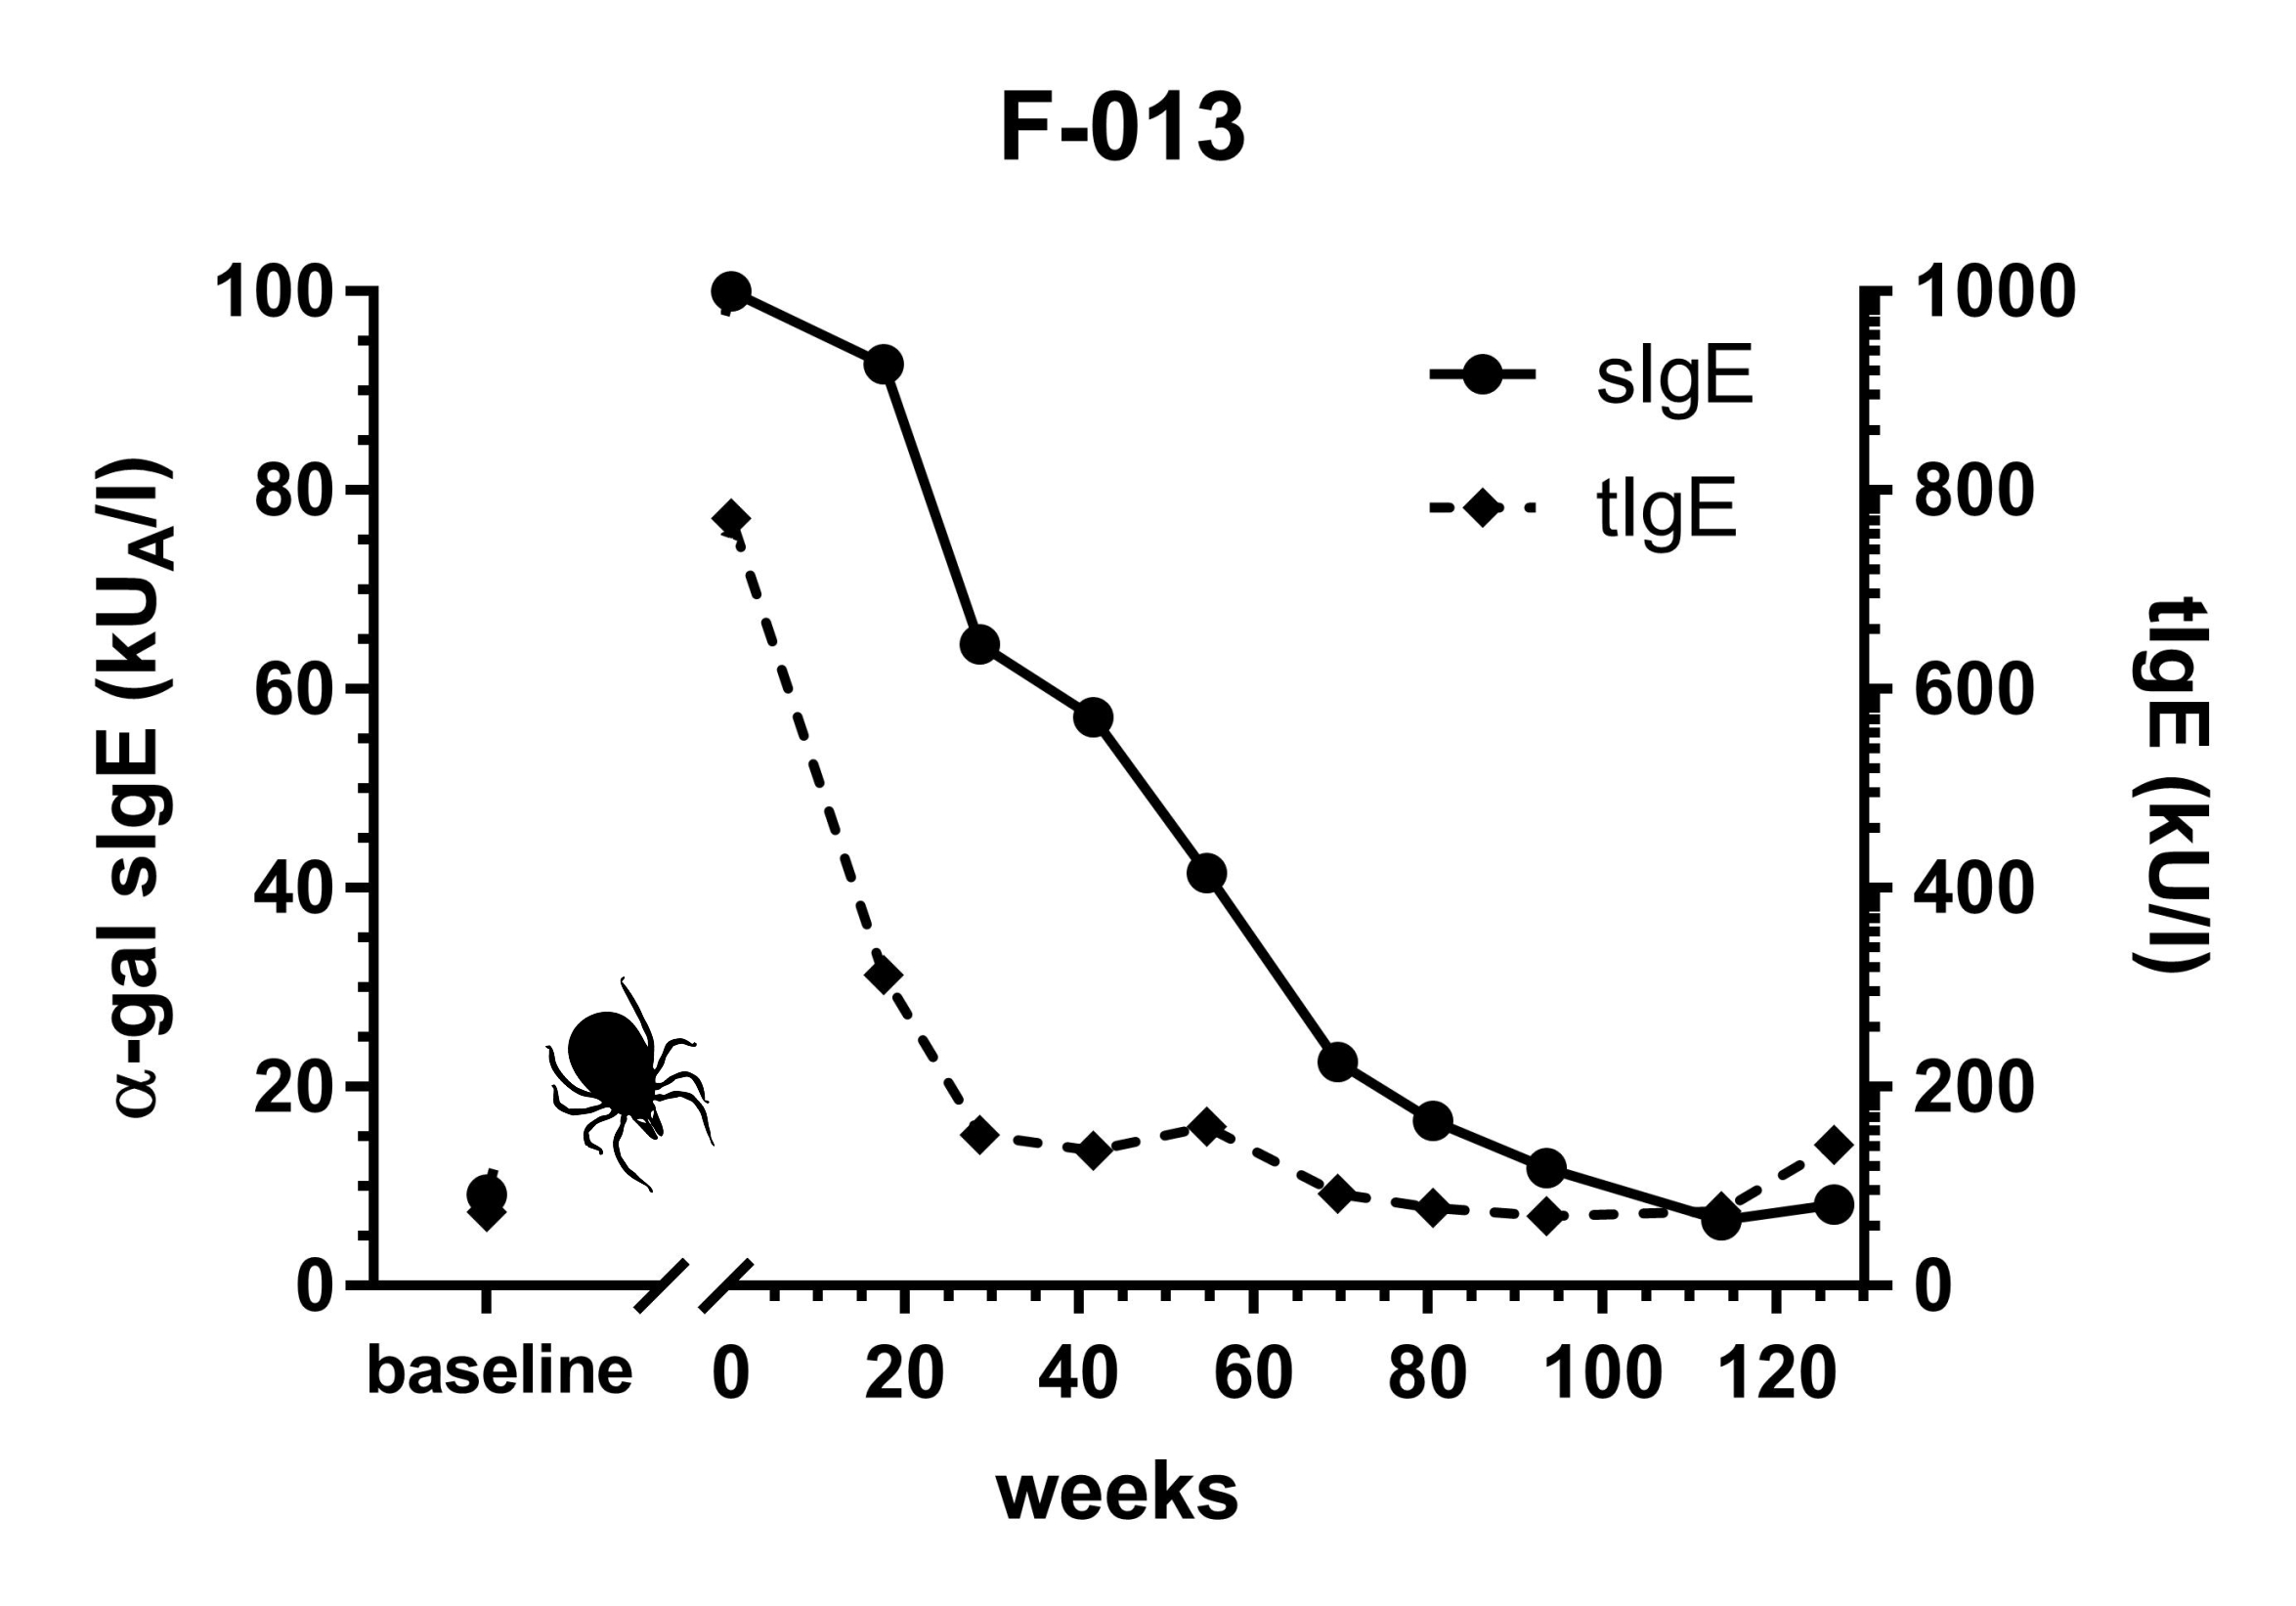

Supplement: Supplementary file 1 [file 20079941]
